# Supplementary material
Source: PubMed Central journal article supplement (PMC5278640)

## **Fenofibrate and Metabolic Syndrome**

Aldi T. Kraja<sup>1\*</sup>, Michael A. Province<sup>1</sup>, Robert J. Straka<sup>2</sup>, Jose M. Ordovas<sup>3</sup>, Ingrid B. Borecki<sup>1</sup>  
and Donna K. Arnett<sup>4</sup>

<sup>1</sup>Division of Statistical Genomics, Washington University School of Medicine, St. Louis, MO, USA;

<sup>2</sup>Department of Experimental and Clinical Pharmacology, University of Minnesota, Minneapolis, MN, USA;

<sup>3</sup>Nutrition and Genomics Laboratory, School of Nutrition Science and Policy at Tufts University, Boston, MA, USA;

<sup>4</sup>Department of Epidemiology, School of Public Health, University of Alabama at Birmingham, AL, USA.

### **Supplemental material**

#### **Materials and Methods**

The maximal sampled population consisted of 1,107 white subjects with no missing phenotypes on 10 traits studied (Table 1). Most of the subjects participated in all clinical visits as part of the Genetics of Lipid Lowering Drugs and Diet Network (GOLDN) study which, in part recruited from participants of the NHLBI Family Heart Study [85-87]. The GOLDN study is a clinical familial study with two treatment arms, one related to FF treatment and one to a fat-load meal. Our study is focused on examining the effects of FF on the lipid profiles (see Supplemental Figure 2). Subjects came to the clinic for five visits with two intermediate phone calls to check drug safety and compliance. Visit 0 served as a screening visit to obtain consent and test for blood chemistries. In addition, after consultation with and approval of their physicians, subjects were asked to discontinue any prescription, non-prescription and nutraceuticals which may affect lipid levels for a period of at least 4 weeks before our clinical trial. The time between visit 0 and visit 1 served as a washout period of any previous lipid lowering medication. Visit 1 was approximately 4 to 8 weeks after visit 0. Visit 2 (first draw of the blood) was only a day after visit 1, and the average of visit 1 and visit 2 serves as the baseline of the lipid measurements. At

the end of this period FF tablets were dispensed to study participants. Two phone calls, approximately one and two weeks apart after visit 2 were to study subjects in order to verify medication compliance and inquire about tolerance to the study medication. Visit 3 in the clinic was approximately 3 to 4 weeks after visit 2, and visit 4 (first draw of the blood) was one day after visit 3.

Between the initial (visits 1 and 2) and follow-up clinical visits (visits 3 and 4) participants received one tablet of 160 mg/day FF TriCor® medication (Abbott Laboratories, Chicago, IL, USA), (details of the GOLDN design are provided in the Supplemental Figure 2). Ten phenotypes were analyzed in our study, body mass index (**BMI**- kg/m<sup>2</sup>), waist circumference (**WAIST**- cm), waist-to-hip ratio (**WHR**), plasma insulin (**INS**-µl/l), plasma glucose (**GLUC**-mg/dL), **TG** (mg/dL), **LDLC** (mg/dL), **HDLC** (mg/dL), systolic- and diastolic blood pressure (**SBP**, **DBP**- mm Hg). Only three of them, TG, HDLC, and LDLC combined with INS were the main contributors in a factor, which was named by us as **lipids MetS domain**. This domain and its change represent the main focus of our study (see Statistical Analysis). Weight was measured at baseline and also after the FF treatment with a beam balance. Height was measured without shoes with fixed stadiometer. The other anthropometric- and blood pressure measurements were collected from all participants at the baseline visit. WHR was calculated as the ratio of waist measured at the level of umbilicus divided by hip circumference measured at the maximal hip girth. Plasma insulin was quantified by the Human Insulin Specific RIA Kit (Linco Research). Plasma glucose was measured with the method of hexokinase-mediated reaction on a Hitachi 911 (Roche Diagnostics). Blood pressure was measured as the average of two consecutive sitting measurements after a five-minute rest, with an oscillometric device

(Dinamap Pro Series 100, GE Medical Systems) and Critikon™ blood pressure cuffs by Johnson & Johnson.

The biochemical measurements were collected before and after FF treatment. TG was measured by glycerol-blanked enzymatic method (Trig/GB, Roche Diagnostics Corporation, Indianapolis, IN) on the Roche /Hitachi 911 Automatic Analyzer. The HDLC was measured, after precipitation of non-HDLC with magnesium/dextran, on the Hitachi 911 using an esterase, oxidase reaction (Chol R1, Roche Diagnostics Corporation). LDLC was measured by a homogeneous direct method (LDLC, Direct Liquid Select™ Cholesterol Reagent, Equal Diagnostics, Exton, PA) on the Hitachi 911. Participants were asked to fast for 12 hours before a clinical visit. If subjects fasted less than 8 hours we excluded that particular subject's measurements from our analysis. The GOLDN study had genotyped 29 candidate genes, with a total of 115 SNPs selected for important polymorphisms in the Nutrition and Genomics Laboratory of the Tuft University, Boston, MA. The methodology of the SNPs genotyping is described in detail in previous published papers [90-92].

The study participants who had a history of liver, kidney, pancreas, or gall bladder disease, or malabsorption, or currently used insulin, were also excluded. Participants were  $\geq 18$  years of age, and withdrew the lipid-lowering medications at least four weeks prior to the initial clinical visit. Written informed consent was obtained from each participant.

### **Statistical analysis**

TG and INS were log transformed; GLUC was transformed as the inverse of the squared value ( $1/GLUC^2$ ) to achieve a normal distribution. The 10 variables were adjusted for age, age<sup>2</sup>, and age<sup>3</sup> in a step-wise regression when significant age contributions within gender were present. Factor analysis (FA) was performed for each visit on the 10 residuals of the adjusted variables.

The factor analysis model is  $\mathbf{x} = \boldsymbol{\lambda}\mathbf{f} + \boldsymbol{\varepsilon}$  where  $\mathbf{x}$  represents a  $p$ -element row-vector of real variables studied,  $\boldsymbol{\lambda}$  is a  $p \times k$  matrix of *loadings*,  $\mathbf{f}$  is a  $k$ -element vector of *scores* and  $\boldsymbol{\varepsilon}$  - a  $p$ -element vector of errors. Only  $\mathbf{x}$  is observed. The analysis was performed with the FACTANAL function of Splus 8.0, operated in batch mode through Cygwin installed on the Microsoft Windows OS Vista Professional. The maximum likelihood method and Varimax rotation were the selected options to fit the appropriate model. Variables measured only once, as for example WAIST, (assumed not to change much during the study period), were repeated as the same variable in all other visits factor analyses. BMI before the treatment was repeated as the same for all other visits before treatment, and BMI of visit 3 (after treatment) was repeated as the same variable at visit 4. Only lipid variables were measured at each visit, therefore our focus was only on the MetS lipids domain. The rest of the variables are used only to construct a particular factor analysis (See Supplemental Figure 3 for their correlation pattern). Factor scores for the MetS lipids domain, for each subject, and for each visit were produced. (See Supplemental Figure 4)

In addition, random coefficients model (RCM) was performed in SAS by creating a treatment class variable which differentiated factor scores of visits 1 and 2 as before treatment, and factor scores of visits 3 and 4 as after treatment. This class variable was used in the repeated statement of the mixed model in SAS to produce the random intercepts and slopes for each subject. The model is  $y_{ij} = \alpha + \beta x_{ij} + a_i^* + b_i^* x_{ij} + \varepsilon_{ij}$  where with \* are indexed the random intercepts  $a$ , and random slopes  $b$  for the  $i$ -subject. Slopes for each subject ( $b_i^*$ ) represent the response change before (visits 1 and 2) versus after FF treatment (visits 3 and 4).

The factor scores for the MetS lipids domain for each visit, as well as the random slopes were utilized as response phenotypes in the linear mixed model to assess the association among the response phenotypes and 115 SNPs of 29 candidate genes. The linear mixed effects models

to test association between factor scores and SNPs polymorphisms were applied in SAS 9.1.3. The mixed statistical model was built on the additive SNP genetic model as fixed effect and pedigree memberships as a random effect to account for the correlations within a pedigree in the variance covariance matrix. In a matrix form the mixed model is  $y = X\beta + Zu + e$ , where  $y$ - was a vector of factor scores from each FA, or a vector of random slopes from the RCM;  $X$ - was the design matrix with recoded genotypes based on the additive genetic model where each SNP was evaluated for its fixed effect  $\beta$ ;  $Z$ -was the design matrix for the random pedigree effects measured through the random effects vector  $u$ ; and  $e$ - was the error vector. In the association tests we applied the option DDFM=KR of degrees of freedom, which specifies the method for computing the denominator degrees of freedom for the tests of fixed effects [107].

Following are **Supplemental Tables 1-7** and **Supplemental Figures 1-4**.

**Supplemental Table 1.** Clinical Trials for TriCor® (Fenofibrate)

| First Author    | Journal                        | Baseline<br>(mg/dL)           | Age<br>(years) | Duration<br>(weeks) | Ethnicity/<br>Country                                | No. of<br>pts | Dosage<br>(mg/day) | Lipid After Treatment (mg/dL) |      |     |
|-----------------|--------------------------------|-------------------------------|----------------|---------------------|------------------------------------------------------|---------------|--------------------|-------------------------------|------|-----|
|                 |                                |                               |                |                     |                                                      |               |                    | LDLC                          | HDLC | TG  |
| Filippatos TD.  | Diabetes Obes Metab.<br>(2008) | LDLC 157<br>HDLC 51<br>TG 240 | 54             | 26                  | Greece                                               | 28            | 200                | 137                           | 53   | 156 |
| Rosenson RS.    | Am Heart J (2008)              | LDLC 139<br>HDLC 31<br>TG 295 | 52             | 13                  | USA                                                  | 25            | 160                | 131                           | 35   | 157 |
| Arca M.         | Metabolism (2007)              | LDLC 176<br>HDLC 45<br>TG 307 | 30-75          | 24                  | Italy                                                | 29            | 200                | 136                           | 51   | 132 |
| Famier M.       | Am Heart J (2007)              | LDLC 163<br>HDLC 46<br>TG 231 | 55             | 12                  | White 79%<br>Hispanic<br>13%<br>Black 2%<br>Other 6% | 184           | 160                | 138                           | 54   | 136 |
| Franceschini G. | Atherosclerosis (2007)         | LDLC 114<br>HDLC 32<br>TG 287 | 56             | 8                   | Italy                                                | 26            | 160                | 123                           | 40   | 164 |
| Hiukka A.       | Diabetologia (2007)            | LDLC 128<br>HDLC 43<br>TG 133 | 62             | 5 years             | Finland                                              | 87            | 200                | 104                           | 43   | 97  |
| Ryan KE.        | Atherosclerosis (2007)         | LDLC 128<br>HDLC 44<br>TG 188 | 46             | 12                  | UK                                                   | 16            | 160                | 119                           | 48   | 123 |
| Davidson MH.    | Clin Cardiol (2006)            | LDLC 121<br>HDLC 36<br>TG 480 | 57             | 8                   | White 93%<br>Black 4%<br>Other 3%                    | 96            | 130                | 139                           | 41   | 304 |
| Zhu S.          | Clin Chem (2006)               | LDLC 129<br>HDLC 51<br>TG 212 | 60             | 104                 | Canada                                               | 115           | 160                | 116                           | 61   | 153 |
| Undas A.        | Thromb Haemost<br>(2005)       | LDLC 151<br>HDLC 62<br>TG 190 | 52             | 4                   | Poland                                               | 22            | 160                | 132                           | 74   | 128 |
| Ducobu J.       | J Cardio Pharm (2003)          | LDLC 203<br>HDLC 41<br>TG 181 | 54             | 13                  | France                                               | 75            | 200                | 167                           | 46   | 111 |
| Wang TD.        | Atherosclerosis (2003)         | LDLC 143<br>HDLC 41<br>TG 265 | 61             | 8                   | Taiwan                                               | 35            | 200                | 127                           | 45   | 137 |

|                          |                                   |                              |    |     |                                     |       |     |     |    |     |
|--------------------------|-----------------------------------|------------------------------|----|-----|-------------------------------------|-------|-----|-----|----|-----|
| Feher MD.                | Diabetes Metab Res<br>Rev. (1999) | LDLC 186<br>HDL 50<br>TG 266 | 62 | 12  | UK                                  | 16    | 200 | 145 | 60 | 149 |
| The Field investigators. | Lancet. (2005)                    | LDLC 120<br>HDL 43<br>TG 155 | 62 | 136 | Australia<br>New Zealand<br>Finland | 4,895 | 200 | 95  | 44 | 131 |

**Suppl. Table 2. Mixed model additive effect: Lipids factor time 0**

| RS_number* | Markname        | DenDF | ProbF       | Estimate | StdErr  | RSquare  | Chrom | Position  | Al1 | MAF   | Al2 |
|------------|-----------------|-------|-------------|----------|---------|----------|-------|-----------|-----|-------|-----|
| rs662799   | APOA5_M1123     | 1102  | 6.29E-06    | 0.3253   | 0.07167 | 0.018471 | 11    | 116168917 | 3   | 6.05  | 1   |
| rs3135506  | APOA5_S16W      | 1104  | 1.68123E-05 | 0.31     | 0.07172 | 0.016727 | 11    | 116167617 | 2   | 6.08  | 3   |
| rs1800590  | LPL_M107        | 1104  | 2.02133E-05 | -0.5117  | 0.1195  | 0.016442 | 8     | 19840951  | 3   | 1.97  | 4   |
| rs5128     | APOC3_3U386     | 1103  | 2.80315E-05 | 0.2441   | 0.05804 | 0.016032 | 11    | 116208850 | 3   | 9.4   | 2   |
| rs1801177  | LPL_D9N         | 1104  | 5.85099E-05 | 0.5849   | 0.145   | 0.014613 | 8     | 19849988  | 1   | 1.51  | 3   |
| rs11703495 | PPARARS11703495 | 1104  | 8.77934E-05 | 0.2285   | 0.05804 | 0.013966 | 22    | 44913855  | 4   | 9.53  | 1   |
| rs4520     | APOC3_G34G      | 1104  | 9.90489E-05 | 0.1465   | 0.03749 | 0.013774 | 11    | 116206745 | 4   | 26.89 | 2   |
| rs5104     | APOA4_N147S     | 1102  | 0.000341345 | 0.1732   | 0.04822 | 0.011724 | 11    | 116197544 | 3   | 13.43 | 1   |
| rs4253728  | PPARARS4253728  | 1096  | 0.001811693 | -0.1244  | 0.03978 | 0.00903  | 22    | 44930586  | 1   | 22.77 | 3   |
| rs2854117  | APOC3_M482      | 1101  | 0.002258837 | -0.1201  | 0.03924 | 0.008552 | 11    | 116205352 | 1   | 24.87 | 3   |
| rs8138102  | PPARARS8138102  | 1102  | 0.004046678 | 0.1245   | 0.04322 | 0.007653 | 22    | 44912271  | 3   | 19.2  | 1   |
| rs2727784  | APOA1_M2803     | 1102  | 0.010976789 | 0.09106  | 0.03574 | 0.005893 | 11    | 116216351 | 3   | 35.54 | 1   |
| rs613808   | APOA1_M2630     | 1104  | 0.011747801 | -0.09407 | 0.03727 | 0.005812 | 11    | 116216178 | 1   | 29.68 | 3   |
| rs5092     | APOA4_T29T      | 1102  | 0.014056662 | 0.1086   | 0.04416 | 0.005575 | 11    | 116198674 | 3   | 17.4  | 1   |
| rs135543   | PPARARS135543   | 1100  | 0.020646401 | 0.08394  | 0.03621 | 0.004951 | 22    | 44875840  | 1   | 31.54 | 3   |
| rs9626730  | PPARARS9626730  | 1098  | 0.031333039 | 0.1003   | 0.04654 | 0.00434  | 22    | 44882702  | 2   | 15.22 | 4   |
| rs429358   | APOE_C130R      | 1103  | 0.041152052 | -0.09181 | 0.04491 | 0.00391  | 19    | 50103781  | 2   | 16.55 | 4   |
| rs676210   | APOB_P2739L     | 1100  | 0.044919457 | -0.08322 | 0.04145 | 0.003771 | 2     | 21143176  | 1   | 21.4  | 3   |
| rs4289236  | ABCG5_I11836    | 1097  | 0.046707291 | 0.08317  | 0.04177 | 0.003662 | 2     | 43965774  | 1   | 19.97 | 3   |
| rs268      | LPL_N291S       | 1103  | 0.049637668 | 0.2866   | 0.1458  | 0.003577 | 8     | 19857809  | 3   | 1.36  | 1   |

Note: \*RS\_number-dbSNP rs name; Markname-marker name; DenDF-denominator degrees of freedom; ProbF-p value of the F statistic test; Estimate-beta coefficient estimated effect; StdErr- standard error of the estimated effect; RSquare-R-square statistic; Chrom- chromosome; Position-location in base pairs in a chromosome; Al1- allele 1; MAF-minor allele frequency; Al2- allele 2.



**Suppl. Table 3. Mixed model additive effect: Lipids factor time 1**

| RS_number* | Markname        | DenDF | ProbF       | Estimate | StdErr  | RSquare  | Chrom | Position  | AI1 | MAF   | AI2 |
|------------|-----------------|-------|-------------|----------|---------|----------|-------|-----------|-----|-------|-----|
| rs8138102  | PPARARS8138102  | 790   | 0.000270277 | 0.1893   | 0.05173 | 0.016892 | 22    | 44912271  | 3   | 19.2  | 1   |
| rs11703495 | PPARARS11703495 | 791   | 0.000277992 | 0.2455   | 0.06723 | 0.016791 | 22    | 44913855  | 4   | 9.53  | 1   |
| rs3135506  | APOA5_S16W      | 791   | 0.000323282 | 0.3186   | 0.08822 | 0.016296 | 11    | 116167617 | 2   | 6.08  | 3   |
| rs1801177  | LPL_D9N         | 791   | 0.000869937 | 0.6378   | 0.1908  | 0.01405  | 8     | 19849988  | 1   | 1.51  | 3   |
| rs4253728  | PPARARS4253728  | 787   | 0.001247784 | -0.1559  | 0.04812 | 0.013429 | 22    | 44930586  | 1   | 22.77 | 3   |
| rs1800590  | LPL_M107        | 790   | 0.004561984 | -0.4429  | 0.1557  | 0.010279 | 8     | 19840951  | 3   | 1.97  | 4   |
| rs9626730  | PPARARS9626730  | 788   | 0.005160345 | 0.1587   | 0.05657 | 0.010112 | 22    | 44882702  | 2   | 15.22 | 4   |
| rs135543   | PPARARS135543   | 789   | 0.006304371 | 0.122    | 0.04456 | 0.009489 | 22    | 44875840  | 1   | 31.54 | 3   |
| rs662799   | APOA5_M1123     | 789   | 0.007464295 | 0.2401   | 0.0895  | 0.009428 | 11    | 116168917 | 3   | 6.05  | 1   |
| rs5128     | APOC3_3U386     | 790   | 0.011347549 | 0.1914   | 0.07541 | 0.008574 | 11    | 116208850 | 3   | 9.4   | 2   |
| rs2854117  | APOC3_M482      | 789   | 0.015477798 | -0.1174  | 0.04838 | 0.007713 | 11    | 116205352 | 1   | 24.87 | 3   |
| rs6507931  | LIPG_I24582     | 791   | 0.017126061 | 0.0991   | 0.04148 | 0.007187 | 18    | 45367006  | 2   | 44.97 | 4   |
| rs405509   | APOE_M226       | 791   | 0.020769115 | 0.09828  | 0.04242 | 0.006835 | 19    | 50100676  | 1   | 48.83 | 2   |
| rs715948   | LRP1_I10701     | 789   | 0.021669958 | -0.1019  | 0.04428 | 0.006963 | 12    | 55819249  | 1   | 31.09 | 3   |
| rs135550   | PPARARS135550   | 787   | 0.022245391 | -0.1052  | 0.04591 | 0.00669  | 22    | 44873753  | 3   | 28.72 | 1   |
| rs4520     | APOC3_G34G      | 791   | 0.027591278 | 0.1034   | 0.04685 | 0.00628  | 11    | 116206745 | 4   | 26.89 | 2   |
| rs5090     | APOA4_M35       | 791   | 0.029582924 | 0.2169   | 0.09953 | 0.006016 | 11    | 116199265 | 3   | 5.14  | 2   |
| rs2276269  | LIPG_I13576     | 791   | 0.03029449  | -0.09013 | 0.04153 | 0.005943 | 18    | 45356000  | 4   | 44.63 | 2   |
| rs1981429  | SDC4_I1372      | 788   | 0.030684819 | 0.09197  | 0.04248 | 0.00608  | 20    | 43409107  | 1   | 49.96 | 2   |
| rs3736265  | PPARGC1A_T612M  | 791   | 0.032919526 | 0.1984   | 0.09283 | 0.005916 | 4     | 23490976  | 1   | 5.82  | 3   |
| rs5104     | APOA4_N147S     | 790   | 0.035122907 | 0.129    | 0.06113 | 0.005952 | 11    | 116197544 | 3   | 13.43 | 1   |
| rs268      | LPL_N291S       | 791   | 0.0384302   | 0.3876   | 0.1869  | 0.005537 | 8     | 19857809  | 3   | 1.36  | 1   |
| rs2727784  | APOA1_M2803     | 790   | 0.038588176 | 0.09112  | 0.04397 | 0.005474 | 11    | 116216351 | 3   | 35.54 | 1   |
| rs1042031  | APOB_E4181K     | 790   | 0.047492709 | 0.1115   | 0.05616 | 0.005135 | 2     | 21137405  | 1   | 16.94 | 3   |

\*See Suppl. *Table 2* note.

**Suppl. Table 4. Mixed model additive effects, Lipids factor time 2**

| RS_number* | Markname        | DenDF | ProbF       | Estimate | StdErr  | RSquare  | Chrom | Position  | AI1 | MAF   | AI2 |
|------------|-----------------|-------|-------------|----------|---------|----------|-------|-----------|-----|-------|-----|
| rs662799   | APOA5_M1123     | 1103  | 1.88E-06    | 0.3588   | 0.07487 | 0.02049  | 11    | 116168917 | 3   | 6.05  | 1   |
| rs5128     | APOC3_3U386     | 1104  | 7.48E-06    | 0.2727   | 0.06059 | 0.018252 | 11    | 116208850 | 3   | 9.4   | 2   |
| rs1801177  | LPL_D9N         | 1105  | 8.76852E-05 | 0.589    | 0.1496  | 0.013868 | 8     | 19849988  | 1   | 1.51  | 3   |
| rs4520     | APOC3_G34G      | 1105  | 9.08716E-05 | 0.1542   | 0.03926 | 0.013852 | 11    | 116206745 | 4   | 26.89 | 2   |
| rs5104     | APOA4_N147S     | 1103  | 0.000100182 | 0.1965   | 0.05032 | 0.013754 | 11    | 116197544 | 3   | 13.43 | 1   |
| rs3135506  | APOA5_S16W      | 1105  | 0.000109566 | 0.2912   | 0.07501 | 0.013497 | 11    | 116167617 | 2   | 6.08  | 3   |
| rs2854117  | APOC3_M482      | 1102  | 0.000210086 | -0.152   | 0.04087 | 0.012491 | 11    | 116205352 | 1   | 24.87 | 3   |
| rs1800590  | LPL_M107        | 1104  | 0.000273701 | -0.4578  | 0.1254  | 0.011968 | 8     | 19840951  | 3   | 1.97  | 4   |
| rs9626730  | PPARARS9626730  | 1099  | 0.00066428  | 0.1657   | 0.04854 | 0.010591 | 22    | 44882702  | 2   | 15.22 | 4   |
| rs135543   | PPARARS135543   | 1101  | 0.001101992 | 0.1239   | 0.03787 | 0.009663 | 22    | 44875840  | 1   | 31.54 | 3   |
| rs5092     | APOA4_T29T      | 1103  | 0.001655324 | 0.1452   | 0.04605 | 0.009034 | 11    | 116198674 | 3   | 17.4  | 1   |
| rs11703495 | PPARARS11703495 | 1105  | 0.002343937 | 0.1856   | 0.06087 | 0.008411 | 22    | 44913855  | 4   | 9.53  | 1   |
| rs2727784  | APOA1_M2803     | 1103  | 0.003082033 | 0.1109   | 0.03739 | 0.007922 | 11    | 116216351 | 3   | 35.54 | 1   |
| rs4253728  | PPARARS4253728  | 1097  | 0.005266108 | -0.1164  | 0.04165 | 0.007139 | 22    | 44930586  | 1   | 22.77 | 3   |
| rs8138102  | PPARARS8138102  | 1103  | 0.006398873 | 0.1236   | 0.04524 | 0.006845 | 22    | 44912271  | 3   | 19.2  | 1   |
| rs135550   | PPARARS135550   | 1098  | 0.0085137   | -0.1036  | 0.0393  | 0.006353 | 22    | 44873753  | 3   | 28.72 | 1   |
| rs676210   | APOB_P2739L     | 1101  | 0.01688377  | -0.1037  | 0.04335 | 0.005232 | 2     | 21143176  | 1   | 21.4  | 3   |
| rs613808   | APOA1_M2630     | 1105  | 0.017607096 | -0.09284 | 0.03905 | 0.005126 | 11    | 116216178 | 1   | 29.68 | 3   |
| rs934197   | APOB_M516       | 1105  | 0.026743899 | 0.08382  | 0.03779 | 0.004463 | 2     | 21179113  | 1   | 33.57 | 3   |
| rs1284300  | PDZK1_I4201     | 1105  | 0.031583956 | 0.1378   | 0.06401 | 0.004197 | 1     | 143236507 | 4   | 8.65  | 2   |
| rs1263177  | APOA4_A5INTER   | 1101  | 0.044833442 | -0.0746  | 0.03714 | 0.003787 | 11    | 116180028 | 2   | 35.08 | 4   |

\*See Suppl. *Table 2* note.

**Suppl. Table 5. Mixed model additive effects, Lipids factor time 3**

| RS_number  | Markname        | DenDF | ProbF       | Estimate | StdErr  | RSquare  | Chrom | Position  | AI1 | MAF   | AI2 |
|------------|-----------------|-------|-------------|----------|---------|----------|-------|-----------|-----|-------|-----|
| rs1801177  | LPL_D9N         | 775   | 0.000437106 | 0.7504   | 0.2125  | 0.015857 | 8     | 19849988  | 1   | 1.51  | 3   |
| rs11703495 | PPARARS11703495 | 775   | 0.00334152  | 0.2221   | 0.07546 | 0.011099 | 22    | 44913855  | 4   | 9.53  | 1   |
| rs1800590  | LPL_M107        | 774   | 0.004037807 | -0.5173  | 0.1794  | 0.010649 | 8     | 19840951  | 3   | 1.97  | 4   |
| rs135543   | PPARARS135543   | 773   | 0.004351251 | 0.1428   | 0.04994 | 0.010471 | 22    | 44875840  | 1   | 31.54 | 3   |
| rs9626730  | PPARARS9626730  | 773   | 0.006440856 | 0.1766   | 0.06466 | 0.009602 | 22    | 44882702  | 2   | 15.22 | 4   |
| rs1042031  | APOB_E4181K     | 774   | 0.006628356 | 0.1733   | 0.06367 | 0.009512 | 2     | 21137405  | 1   | 16.94 | 3   |
| rs4253728  | PPARARS4253728  | 771   | 0.006990036 | -0.1462  | 0.05407 | 0.009473 | 22    | 44930586  | 1   | 22.77 | 3   |
| rs662799   | APOA5_M1123     | 773   | 0.010410825 | 0.2605   | 0.1015  | 0.008607 | 11    | 116168917 | 3   | 6.05  | 1   |
| rs5104     | APOA4_N147S     | 774   | 0.010523085 | 0.1759   | 0.06859 | 0.008566 | 11    | 116197544 | 3   | 13.43 | 1   |
| rs8138102  | PPARARS8138102  | 774   | 0.011562718 | 0.1476   | 0.05832 | 0.008261 | 22    | 44912271  | 3   | 19.2  | 1   |
| rs5128     | APOC3_3U386     | 774   | 0.017302904 | 0.2023   | 0.08481 | 0.007482 | 11    | 116208850 | 3   | 9.4   | 2   |
| rs4148217  | ABCG8_T400K     | 772   | 0.021140344 | -0.138   | 0.05973 | 0.006866 | 2     | 44011084  | 1   | 19.19 | 2   |
| rs5092     | APOA4_T29T      | 774   | 0.027431312 | 0.1406   | 0.06362 | 0.006352 | 11    | 116198674 | 3   | 17.4  | 1   |
| rs268      | LPL_N291S       | 775   | 0.028518446 | 0.4569   | 0.2082  | 0.006193 | 8     | 19857809  | 3   | 1.36  | 1   |
| rs135550   | PPARARS135550   | 771   | 0.029155538 | -0.1125  | 0.05146 | 0.006158 | 22    | 44873753  | 3   | 28.72 | 1   |
| rs3808607  | CYP7A1_M203     | 771   | 0.029574279 | -0.1038  | 0.04762 | 0.006218 | 8     | 59575478  | 3   | 42.41 | 4   |
| rs4520     | APOC3_G34G      | 775   | 0.032226913 | 0.1127   | 0.05255 | 0.005937 | 11    | 116206745 | 4   | 26.89 | 2   |
| rs12497191 | PPARG_M2823     | 775   | 0.036413221 | 0.1512   | 0.07214 | 0.005661 | 3     | 12365135  | 3   | 12.84 | 1   |
| rs1800783  | NOS3_I1103      | 771   | 0.040320653 | 0.1014   | 0.04936 | 0.005466 | 7     | 150127045 | 1   | 37.77 | 4   |
| rs2854117  | APOC3_M482      | 773   | 0.045831187 | -0.1091  | 0.05453 | 0.005261 | 11    | 116205352 | 1   | 24.87 | 3   |

\*See Suppl. *Table 2* note.

**Suppl. Table 6. Mixed model additive effects, Lipids factor time 4**

| RS_number  | Markname        | DenDF | ProbF       | Estimate | StdErr  | RSquare  | Chrom | Position  | AI1 | MAF   | AI2 |
|------------|-----------------|-------|-------------|----------|---------|----------|-------|-----------|-----|-------|-----|
| rs11703495 | PPARARS11703495 | 781   | 0.000457621 | 0.272    | 0.07729 | 0.015789 | 22    | 44913855  | 4   | 9.53  | 1   |
| rs662799   | APOA5_M1123     | 779   | 0.001495072 | 0.3325   | 0.1043  | 0.012932 | 11    | 116168917 | 3   | 6.05  | 1   |
| rs1801177  | LPL_D9N         | 781   | 0.002405703 | 0.6687   | 0.2196  | 0.012025 | 8     | 19849988  | 1   | 1.51  | 3   |
| rs135543   | PPARARS135543   | 779   | 0.005357472 | 0.1435   | 0.0514  | 0.010332 | 22    | 44875840  | 1   | 31.54 | 3   |
| rs8138102  | PPARARS8138102  | 780   | 0.005762646 | 0.1659   | 0.05993 | 0.009911 | 22    | 44912271  | 3   | 19.2  | 1   |
| rs1800783  | NOS3_I1103      | 777   | 0.006650408 | 0.1377   | 0.05059 | 0.009679 | 7     | 150127045 | 1   | 37.77 | 4   |
| rs3808607  | CYP7A1_M203     | 777   | 0.007007322 | -0.1323  | 0.04893 | 0.009455 | 8     | 59575478  | 3   | 42.41 | 4   |
| rs4253728  | PPARARS4253728  | 777   | 0.007054756 | -0.1503  | 0.05564 | 0.009463 | 22    | 44930586  | 1   | 22.77 | 3   |
| rs1042031  | APOB_E4181K     | 780   | 0.010259766 | 0.1683   | 0.06541 | 0.008654 | 2     | 21137405  | 1   | 16.94 | 3   |
| rs5104     | APOA4_N147S     | 780   | 0.012524054 | 0.1768   | 0.07065 | 0.008053 | 11    | 116197544 | 3   | 13.43 | 1   |
| rs5128     | APOC3_3U386     | 780   | 0.014760746 | 0.2135   | 0.08736 | 0.007651 | 11    | 116208850 | 3   | 9.4   | 2   |
| rs5092     | APOA4_T29T      | 780   | 0.019970457 | 0.1526   | 0.06547 | 0.007057 | 11    | 116198674 | 3   | 17.4  | 1   |
| rs2854117  | APOC3_M482      | 779   | 0.021354998 | -0.1294  | 0.05611 | 0.006908 | 11    | 116205352 | 1   | 24.87 | 3   |
| rs4520     | APOC3_G34G      | 781   | 0.022555269 | 0.1235   | 0.05406 | 0.006883 | 11    | 116206745 | 4   | 26.89 | 2   |
| rs2727784  | APOA1_M2803     | 779   | 0.023554588 | 0.1158   | 0.05102 | 0.006903 | 11    | 116216351 | 3   | 35.54 | 1   |
| rs135550   | PPARARS135550   | 777   | 0.027077584 | -0.1172  | 0.05294 | 0.006785 | 22    | 44873753  | 3   | 28.72 | 1   |
| rs12497191 | PPARG_M2823     | 781   | 0.027082911 | 0.1641   | 0.07409 | 0.006497 | 3     | 12365135  | 3   | 12.84 | 1   |
| rs429358   | APOE_C130R      | 780   | 0.030170565 | -0.135   | 0.06216 | 0.006164 | 19    | 50103781  | 2   | 16.55 | 4   |
| rs715948   | LRP1_I10701     | 779   | 0.037989444 | -0.1071  | 0.0515  | 0.005642 | 12    | 55819249  | 1   | 31.09 | 3   |
| rs9626730  | PPARARS9626730  | 779   | 0.040288229 | 0.1358   | 0.0661  | 0.005587 | 22    | 44882702  | 2   | 15.22 | 4   |
| rs1800590  | LPL_M107        | 780   | 0.041396175 | -0.366   | 0.1792  | 0.005655 | 8     | 19840951  | 3   | 1.97  | 4   |
| rs268      | LPL_N291S       | 781   | 0.042012451 | 0.4377   | 0.2149  | 0.005566 | 8     | 19857809  | 3   | 1.36  | 1   |
| rs701106   | SCARB1_I82699   | 781   | 0.044582865 | -0.1267  | 0.06299 | 0.005388 | 12    | 123790516 | 1   | 17.15 | 3   |
| rs6507931  | LIPG_I24582     | 781   | 0.04777362  | 0.09522  | 0.04803 | 0.005524 | 18    | 45367006  | 2   | 44.97 | 4   |
| rs676210   | APOB_P2739L     | 778   | 0.048233992 | -0.1145  | 0.05788 | 0.005211 | 2     | 21143176  | 1   | 21.4  | 3   |

\*See Suppl. *Table 2* note.

**Suppl. Table 7. Mixed model additive effects, Lipids factors RCM beta coefficients associations**

| RS_number | Markname        | DenDF | ProbF       | Estimate | StdErr   | RSquare  | Chrom | Position  | AI1 | MAF   | AI2 |
|-----------|-----------------|-------|-------------|----------|----------|----------|-------|-----------|-----|-------|-----|
| rs1799983 | NOS3_E298D      | 1104  | 8.67509E-05 | 0.007229 | 0.001835 | 0.015007 | 7     | 150133759 | 4   | 31.85 | 3   |
| rs1800783 | NOS3_I1103      | 1101  | 0.000104896 | -0.00697 | 0.001791 | 0.015    | 7     | 150127045 | 1   | 37.77 | 4   |
| rs743507  | NOS3_I19342     | 1105  | 0.000598674 | -0.00686 | 0.001993 | 0.011853 | 7     | 150145136 | 3   | 25.59 | 1   |
| rs3811800 | MTP_M1498       | 1102  | 0.01410056  | -0.0045  | 0.001832 | 0.006613 | 4     | 100851731 | 3   | 32.1  | 1   |
| rs4148217 | ABCG8_T400K     | 1102  | 0.016947961 | 0.005215 | 0.002181 | 0.006191 | 2     | 44011084  | 1   | 19.19 | 4   |
| rs6857641 | FABP2_M193      | 1104  | 0.023281394 | -0.00398 | 0.001752 | 0.005796 | 4     | 120601114 | 4   | 42.18 | 2   |
| rs4697046 | PPARGC1A_I55301 | 1104  | 0.032026439 | -0.00381 | 0.001774 | 0.005214 | 4     | 23512669  | 2   | 37.83 | 4   |

\*See Suppl. *Table 2* note.

**Supplemental Figure 1.** PPAR pathway (source KEGG). Fibrate drugs serve as a ligand to PPAR- $\alpha$ , which in combination with RXR gene activates several genes part of the lipid metabolism.

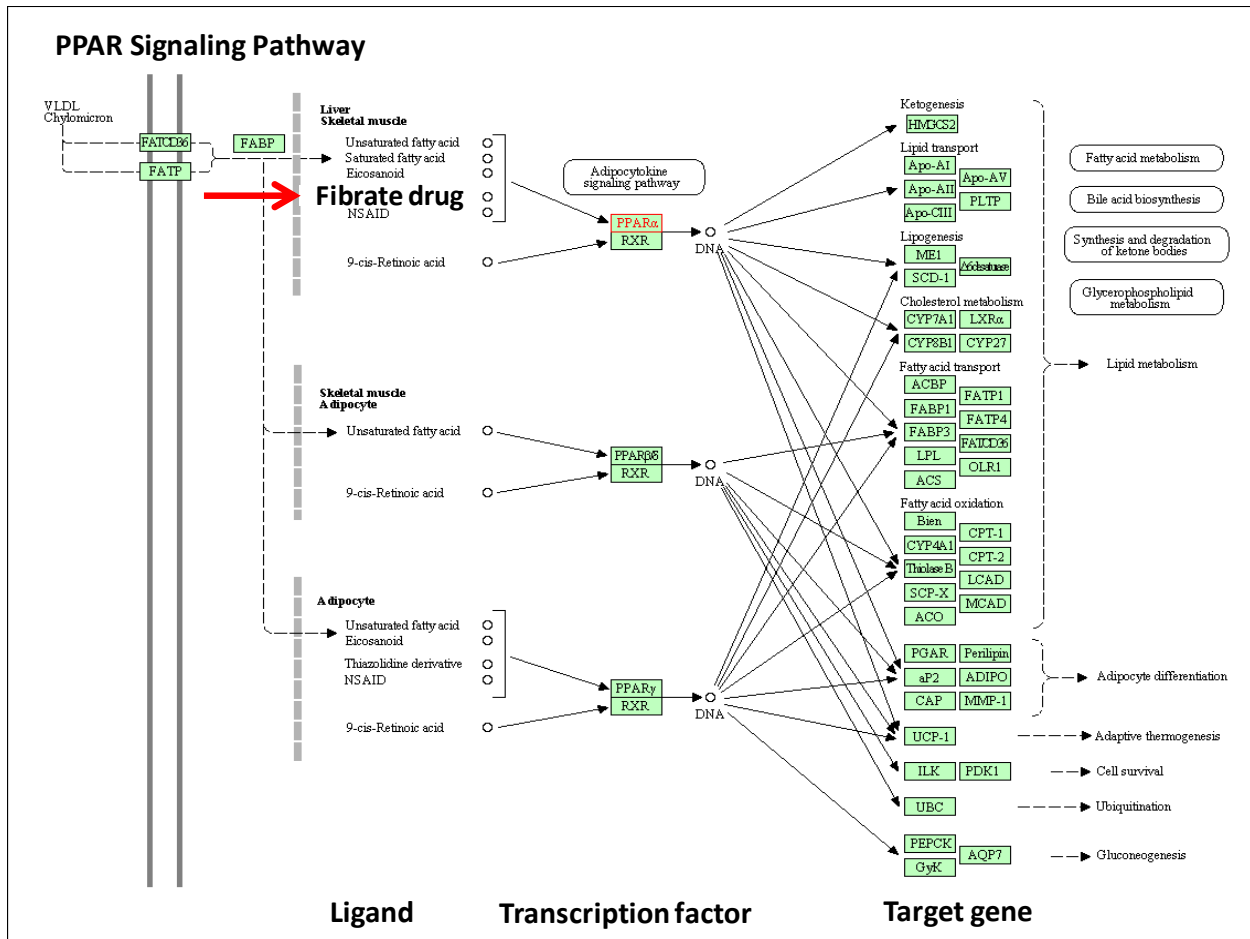

**Supplemental Figure 2.** The fenofibrate arm in the GOLDN design. Subjects participated in 5 clinical visits, in which among others important lipid variables were measured. The period between visit 0 and visit 1 served as a washout period from any previous lipid lowering drugs. After visit 2, participants took a tablet of 160 mg/day TriCor® (fenofibrate).

| Visit                                    | 0                                                                  | 1                                                    | 2                                                                                                      | 3                              | 4                |
|------------------------------------------|--------------------------------------------------------------------|------------------------------------------------------|--------------------------------------------------------------------------------------------------------|--------------------------------|------------------|
| Time                                     | Start                                                              | 4-8 weeks                                            | 1 day<br>(draw 1)                                                                                      | 3-4 weeks                      | 1 day<br>(draw1) |
| Phenotypes measured and important events | TG, HDLC, LDLC<br>Subjects taken off any lipid-lowering medication | BMI, WAIST, WHR, INS, GLUC, SBP, DBP, TG, HDLC, LDLC | TG, HDLC, LDLC<br><u>Fenofibrates dispensed</u><br>Two phone calls follow-up for medication compliance | BMI, INS, GLUC, TG, HDLC, LDLC | TG, HDLC, LDLC   |
| N (Full set)                             | 1,107                                                              | 793                                                  | 1,108                                                                                                  | 777                            | 783              |

  

| Days | 1              | 43 | 44    | 69    | 70 |
|------|----------------|----|-------|-------|----|
|      | Washout Period |    | TRT=0 | TRT=1 |    |

**Supplemental Figure 3.** Correlations of lipids variables before (visits 0, 1, 2) and after (visits 3, 4) fenofibrate treatment. It is quite clear that observations measured one day apart (visits 1 and 2, and visits 3 and 4) are very highly correlated for the same lipid variable. The correlation triangle, as well as their color coded correlation shows the clear trend that measurements of lipids for the same subjects were of high quality.

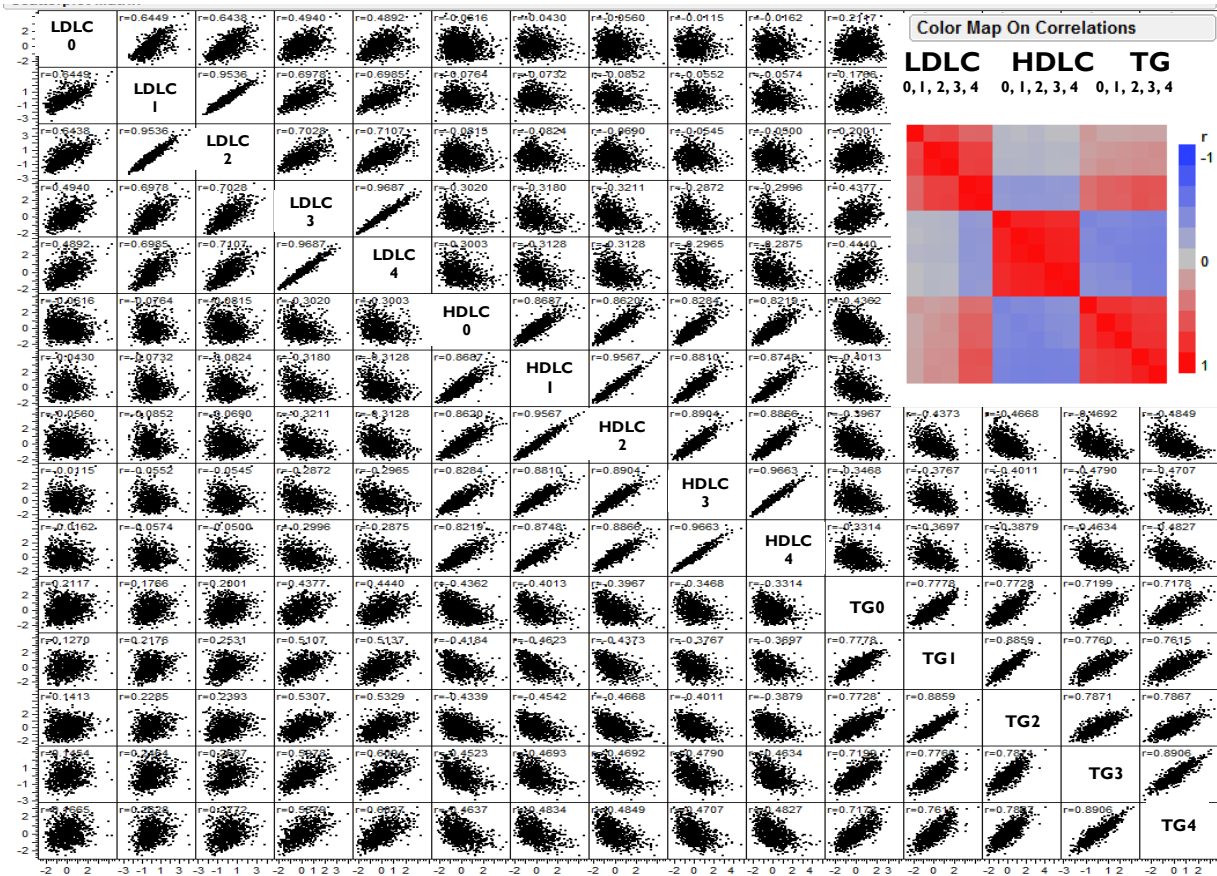



**Supplemental Figure 4.** Factor structure of the metabolic syndrome lipids domain. The vertical bars represent loadings of variables into the lipids factor. Before treatment (visit 0, 1, and 2) TG, HDLC and INS were the major contributors into MetS lipids domain. After fenofibrate treatment LDLC became also an important contributor in this factor structure.

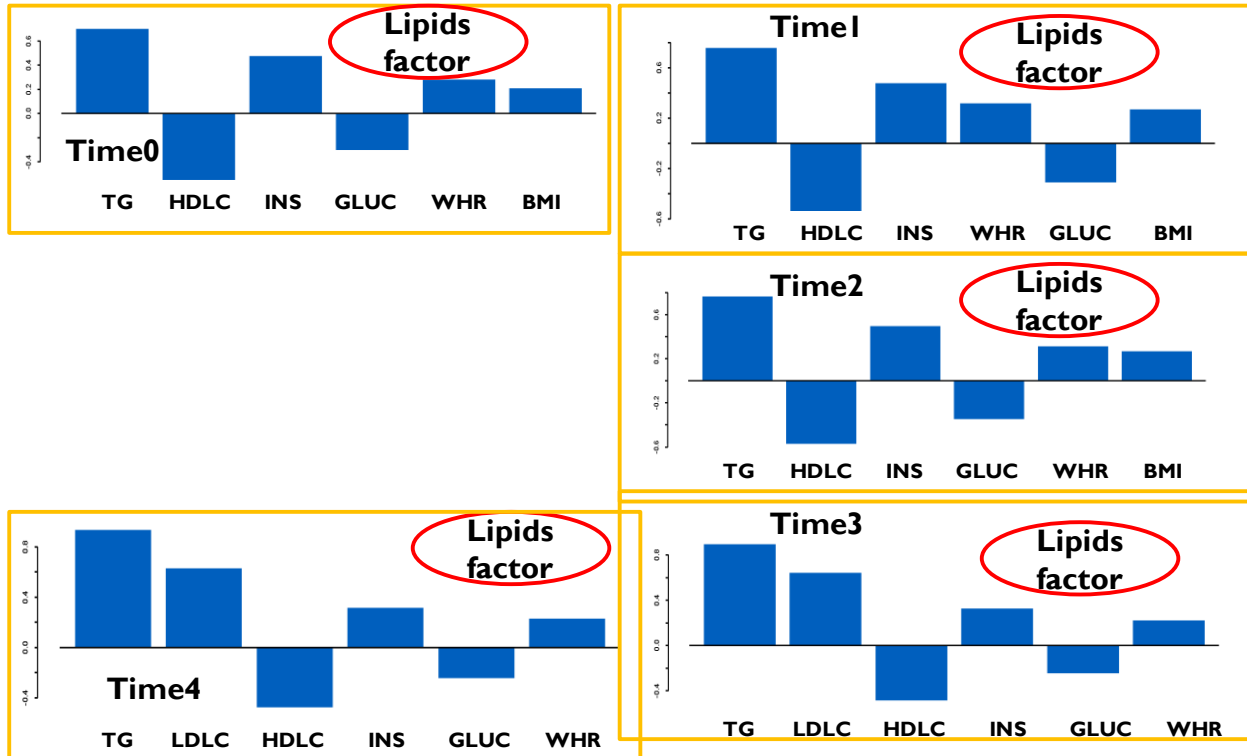

Supplement: NIHMS685591-supplement-Supp_info.pdf [file NIHMS685591-supplement-Supp_info.pdf]
